# Supplementary material for: Temporal whole field sawtooth flicker without a spatial component elicits a myopic shift following optical defocus irrespective of waveform direction in chicks
Source: PeerJ. 2019 Jan 23;7:e6277. doi: 10.7717/peerj.6277 (PMC6347968; doi:10.7717/peerj.6277)
Supplement: Supplemental Information 1 [file peerj-07-6277-s001.xlsx]

## Sheet: LED TLM Duplicates deleted
ID	Lens	Light	Frequency (Hz)	re_ret	le_ret	re_al	re_vc	le_al	le_vc	re_ac	le_ac
300	No Lens	NF	0	-0.75	1	9.7	5.88	9.73	5.9	1.47	1.46
301	No Lens	NF	0	1.5	0.75	9.57	5.7	9.75	5.7	1.4	1.42
302	No Lens	NF	0	-0.5	1.25	9.43	5.5	9.33	5.45	1.45	1.43
303	No Lens	NF	0	1.25	1.25	9.8	5.83	9.73	5.77	1.47	1.43
304	No Lens	NF	0	0.75	2.5	9.67	5.83	9.53	5.63	1.44	1.43
305	No Lens	NF	0	0	0.25	9.5	5.58	9.53	5.67	1.57	1.5
306	No Lens	NF	0	1.75	1.75	9.67	5.7	9.53	5.53	1.6	1.58
307	No Lens	NF	0	0.25	1.25	9.8	5.87	9.8	6	1.53	1.43
308	No Lens	NF	0	3	2	9.23	5.43	9.13	5.33	1.46	1.43
309	No Lens	NF	0	-0.75	0.25	9.43	5.63	9.4	5.6	1.38	1.47
310	No Lens	NF	0	0	-0.75	9.77	6.03	9.8	6.03	1.37	1.4
311	No Lens	NF	0	-0.5	1.25	9.33	5.7	9.33	5.6	1.18	1.23
312	No Lens	NF	0	1	1.75	9.63	5.87	9.6	5.97	1.33	1.3
313	No Lens	NF	0	1.75	2.25	9.77	5.9	9.6	5.93	1.4	1.27
314	No Lens	NF	0	0.25	2.25	9.67	5.87	9.5	5.77	1.44	1.3
315	No Lens	NF	0	2	0.25	9.47	5.5	9.4	5.57	1.44	1.37
316	No Lens	NF	0	1.5	0	9.55	5.75	9.5	5.8	1.17	1.3
317	No Lens	NF	0	-0.25	-0.5	9.84	6.3	9.8	6.24	1.18	1.16
318	No Lens	NF	0	0	0.38	9.63	5.98	9.5	5.77	1.15	1.23
319	Negative Lens	NF	0	-8	1	9.23	5.47	8.7	5.1	1.33	1.47
320	Negative Lens	NF	0	-8	2.5	9.5	5.87	9.03	5.4	1.47	1.4
321	Negative Lens	NF	0	-8.5	0.5	9.03	5.4	8.63	5.1	1.46	1.4
322	Negative Lens	NF	0	-8	1.25	9.23	5.43	8.87	5.1	1.63	1.47
323	Negative Lens	NF	0	-7.5	1.5	9.1	5.53	8.63	5.1	1.43	1.4
324	Negative Lens	NF	0	-10.5	0.25	9.1	5.23	8.53	4.89	1.73	1.46
325	Negative Lens	NF	0	-8	1	9.4	5.63	8.93	5.23	1.47	1.46
326	Negative Lens	NF	0	-8	1.5	8.93	5.23	8.63	5.07	1.56	1.46
327	Negative Lens	NF	0	-9.5	1	9.23	5.4	8.8	5.04	1.48	1.47
328	Negative Lens	NF	0	-8	2	9.17	5.53	8.6	5.1	1.44	1.33
329	Positive Lens	NF	0	9	1.25	8.56	4.7	8.73	5.1	1.73	1.43
330	Positive Lens	NF	0	9	1.5	8.53	4.87	8.77	5.2	1.36	1.64
331	Positive Lens	NF	0	8	1.5	8.8	4.73	8.8	5.17	1.83	1.63
332	Positive Lens	NF	0	10.5	1.5	8.57	5	8.83	5.2	1.47	1.6
333	Positive Lens	NF	0	9.5	0.75	8.47	4.73	8.73	5.17	1.64	1.5
334	Positive Lens	NF	0	9	0	8.6	5.1	8.98	5.35	1.53	1.53
335	Positive Lens	NF	0	11	2	8.5	5.03	8.77	5.23	1.3	1.37
336	Positive Lens	NF	0	11	2	8.07	4.4	8.33	4.8	1.54	1.36
337	Positive Lens	NF	0	9.25	1.5	8.27	4.73	8.67	5.1	1.37	1.4
338	Positive Lens	NF	0	10.25	1.5	8.03	4.3	8.8	5.2	1.46	1.4
339	Positive Lens	NF	0	10	0.75	8.5	4.63	8.8	5.07	1.63	1.47
69	No Lens	FastOFF	1	0	0	8.72	5.44	8.65	5.39	1.16	1.15
70	No Lens	FastOFF	1	-0.5	-0.5	8.71	5.2	8.67	5.23	1.3	1.26
71	No Lens	FastOFF	1	-1.75	0	8.75	5.24	8.7	5.18	1.35	1.51
72	No Lens	FastOFF	1	-1.75	-1	9.17	5.65	9.07	5.57	1.46	1.43
73	No Lens	FastOFF	1	-3.25	-1.75	8.88	5.34	8.84	5.3	1.33	1.3
204	No Lens	FastOFF	1	0.25	0.5	8.96	5.38	8.84	5.41	1.31	1.59
205	No Lens	FastOFF	1	0.5	0.5	8.58	5.12	8.62	5.17	1.24	1.27
206	No Lens	FastOFF	1	1	1	8.78	5.19	8.65	5.21	1.47	1.29
207	No Lens	FastOFF	1	0.5	0	8.75	5.26	8.67	5.18	1.43	1.45
60	Negative Lens	FastOFF	1	-13.5	0	9.44	5.83	8.71	5.23	1.36	1.47
64	Negative Lens	FastOFF	1	-7.5	1	9.07	5.58	8.68	5.26	1.35	1.27
65	Negative Lens	FastOFF	1	-12.5	0	9.44	5.82	8.81	5.43	1.34	1.2
67	Negative Lens	FastOFF	1	-9	0	9.03	5.65	8.61	5.19	1.22	1.24
68	Negative Lens	FastOFF	1	-8.5	0.5	9.07	5.51	8.58	5.05	1.44	1.35
199	Negative Lens	FastOFF	1	-14	-0.25	9.44	5.71	9	5.38	1.48	1.55
200	Negative Lens	FastOFF	1	-13.5	0.75	9.41	5.73	8.91	5.47	1.41	1.24
201	Negative Lens	FastOFF	1	-14.5	0	9.72	5.95	9.05	5.44	1.56	1.36
202	Negative Lens	FastOFF	1	-18	1	9.41	5.75	9.04	5.48	1.45	1.38
203	Negative Lens	FastOFF	1	-15	0	9.22	5.52	8.69	5.04	1.4	1.69
59	Positive Lens	FastOFF	1	4.5	0	9.42	5.87	8.93	5.48	1.46	1.38
61	Positive Lens	FastOFF	1	-0.5	-0.5	9.01	5.26	8.88	5.47	1.53	1.25
62	Positive Lens	FastOFF	1	0.75	0.25	8.65	5.1	8.57	4.98	1.36	1.39
63	Positive Lens	FastOFF	1	2	0.25	9.41	5.71	8.88	5.28	1.64	1.47
194	Positive Lens	FastOFF	1	-5	0	9.03	5.31	8.8	5.33	1.48	1.37
195	Positive Lens	FastOFF	1	3.5	0.75	8.76	5.02	9.11	5.57	1.54	1.34
196	Positive Lens	FastOFF	1	5.5	0.5	8.48	5.02	9.1	5.52	1.36	1.42
197	Positive Lens	FastOFF	1	-2	0.25	9.01	5.4	8.8	5.28	1.48	1.14
198	Positive Lens	FastOFF	1	-2	0	8.54	5.16	8.61	5.14	1.12	1.24
111	No Lens	FastOFF	4	1	0.75	8.58	5.16	8.5	5.15	1.2	1.15
112	No Lens	FastOFF	4	0.5	0.5	8.74	5.23	8.75	5.23	1.33	1.31
113	No Lens	FastOFF	4	-2	-1.75	8.31	5.05	8.36	5.13	0.95	0.99
114	No Lens	FastOFF	4	-2.5	1	8.67	5.28	8.53	5.16	1.26	1.15
115	No Lens	FastOFF	4	0.5	0.5	8.97	5.51	8.95	5.52	1.25	1.28
259	No Lens	FastOFF	4	0	0	8.68	5.25	8.65	5.32	1.26	1.38
260	No Lens	FastOFF	4	-0.25	-0.25	8.81	5.2	8.66	5.35	1.47	1.35
261	No Lens	FastOFF	4	0.75	0.75	8.56	5.1	8.49	5.08	1.37	1.37
262	No Lens	FastOFF	4	-0.5	-0.5	8.57	5.06	8.46	5.1	1.37	1.23
106	Negative Lens	FastOFF	4	-1.25	-0.5	8.97	5.67	8.75	5.41	1.13	1.19
107	Negative Lens	FastOFF	4	-2.5	0.5	8.5	5.22	8.4	5.06	1.07	1.14
108	Negative Lens	FastOFF	4	2.25	2.5	8.84	5.52	8.78	5.43	1.15	1.14
109	Negative Lens	FastOFF	4	-3.25	0	8.95	5.54	8.6	5.13	1.24	1.24
110	Negative Lens	FastOFF	4	-3.25	0	9.13	5.61	8.76	5.34	1.32	1.2
253	Negative Lens	FastOFF	4	-11.5	0	9.26	5.59	8.59	5.2	1.71	1.33
254	Negative Lens	FastOFF	4	-12	-1	9.33	5.86	8.92	5.44	1.47	1.48
255	Negative Lens	FastOFF	4	-12.5	-1	9.26	5.65	8.85	5.19	1.61	1.45
256	Negative Lens	FastOFF	4	-10.5	-0.5	9.1	5.56	8.49	5.02	1.44	1.25
257	Negative Lens	FastOFF	4	-12	0.5	9.06	5.49	8.58	5.14	1.46	1.43
258	Negative Lens	FastOFF	4	-12.5	1	8.97	5.45	8.55	5.05	1.34	1.35
101	Positive Lens	FastOFF	4	6.5	1.5	8.36	5.02	8.54	5.22	1.22	1.21
102	Positive Lens	FastOFF	4	6	0	8.59	5.3	8.78	5.37	1.21	1.3
103	Positive Lens	FastOFF	4	7	-0.5	8.42	5.1	8.82	5.48	1.13	1.16
104	Positive Lens	FastOFF	4	5.5	1.5	8.43	5.14	8.62	5.33	1.19	1.13
105	Positive Lens	FastOFF	4	5.5	0.25	8.44	5.1	8.7	5.34	1.24	1.23
246	Positive Lens	FastOFF	4	4.5	0	8.12	4.64	8.62	5.24	1.29	1.16
247	Positive Lens	FastOFF	4	4.75	0	8.34	4.94	8.43	5.13	1.34	1.2
248	Positive Lens	FastOFF	4	3.5	0.5	8.52	5	8.65	5.04	1.37	1.41
249	Positive Lens	FastOFF	4	5.25	0.5	8.51	4.93	8.75	5.16	1.42	1.36
250	Positive Lens	FastOFF	4	8	2	8.78	5.37	8.82	5.27	1.25	1.54
251	Positive Lens	FastOFF	4	4.5	0	8.2	4.72	8.58	5.1	1.38	2.03
84	No Lens	FastON	1	1.25	0.5	8.88	5.49	8.75	5.46	1.3	1.08
85	No Lens	FastON	1	0	0.5	8.76	5.62	8.75	5.56	1.04	1.08
86	No Lens	FastON	1	-0.5	-1	8.85	5.51	8.83	5.59	1.19	1.05
87	No Lens	FastON	1	0.75	0.75	8.96	5.55	8.84	5.42	1.24	1.2
88	No Lens	FastON	1	-0.25	-0.25	8.76	5.4	8.78	5.44	1.08	1.08
222	No Lens	FastON	1	2.5	2.5	8.63	5.21	8.54	5.09	1.21	1.26
223	No Lens	FastON	1	3	2.5	8.48	5.07	8.42	5.22	1.24	1.05
224	No Lens	FastON	1	1	2.5	8.64	5.23	8.5	5.12	1.2	1.19
225	No Lens	FastON	1	1	1	8.67	5.21	8.56	5.14	1.31	1.28
226	No Lens	FastON	1	0	0.5	8.76	5.25	8.67	5.37	1.4	1.29
227	No Lens	FastON	1	1	1	8.93	5.38	8.82	5.4	1.27	1.29
79	Negative Lens	FastON	1	1.25	0.5	8.43	5.25	8.67	5.38	0.98	1.06
80	Negative Lens	FastON	1	-8.5	-0.5	9.07	5.83	8.64	5.37	1.1	1.04
81	Negative Lens	FastON	1	-9.5	0.5	9.52	6.04	8.91	5.48	1.46	1.31
82	Negative Lens	FastON	1	-8	0.5	9.05	5.74	8.77	5.39	1.17	1.12
83	Negative Lens	FastON	1	-8.5	0	9.16	5.97	8.83	5.56	1.07	1.12
215	Negative Lens	FastON	1	-9.5	-1.5	9.27	5.69	8.87	5.45	1.29	1.4
216	Negative Lens	FastON	1	-10	0	9.03	5.57	8.3	5.02	1.25	1.11
217	Negative Lens	FastON	1	-8	1	9.4	5.81	8.12	5.41	1.38	0.5
218	Negative Lens	FastON	1	-9	1	9.57	5.96	8.92	5.44	1.47	1.37
219	Negative Lens	FastON	1	-11	1	9.31	5.87	8.65	5.3	1.28	1.36
221	Negative Lens	FastON	1	-12	1	9.71	6.04	8.91	5.55	1.46	1.37
74	Positive Lens	FastON	1	8	0	8.93	5.66	8.82	5.46	1.22	1.12
75	Positive Lens	FastON	1	6	-2	8.54	5.13	8.83	5.49	1.15	1.1
76	Positive Lens	FastON	1	3.5	-0.25	8.87	5.38	9.11	5.59	1.25	1.18
77	Positive Lens	FastON	1	5	-0.5	8.71	5.32	8.81	5.44	1.29	1.29
78	Positive Lens	FastON	1	8	1.5	8.68	5.3	9	5.52	1.27	1.3
208	Positive Lens	FastON	1	5	1.5	9.3	5.63	8.75	5.39	1.48	1.34
209	Positive Lens	FastON	1	8	0	9.36	5.81	8.88	5.37	1.37	1.32
210	Positive Lens	FastON	1	10	0.75	8.76	5.25	9.03	5.57	1.47	1.4
211	Positive Lens	FastON	1	7	0	8.55	5.27	8.65	5.31	1.21	1.24
212	Positive Lens	FastON	1	5.5	-1	8.76	5.52	8.36	5.12	1.14	1.2
213	Positive Lens	FastON	1	-6	0.5	8.92	5.41	8.8	5.36	1.51	1.31
214	Positive Lens	FastON	1	7.5	1.5	8.21	4.78	8.65	5.24	1.29	1.39
13	No Lens	FastON	4	1	1	8.75	5.5	8.66	5.42	1.08	1.05
14	No Lens	FastON	4	-2	0.25	8.48	5.31	8.43	5.28	1	0.97
16	No Lens	FastON	4	0.5	0.5	8.36	5.14	8.38	5.18	1.02	1.03
17	No Lens	FastON	4	0	0	8.65	5.42	8.55	5.25	1.05	1.15
18	No Lens	FastON	4	0.25	-0.25	8.6	5.24	8.56	5.11	1.12	1.19
240	No Lens	FastON	4	1	1	8.6	5.08	8.58	5.1	1.38	1.34
241	No Lens	FastON	4	-1	0	8.91	5.29	8.8	5.17	1.54	1.37
242	No Lens	FastON	4	5	2	8.84	5.27	8.72	5.13	1.46	1.43
243	No Lens	FastON	4	0.25	0.75	8.9	5.32	8.8	5.16	1.41	1.41
244	No Lens	FastON	4	1	1	9.03	5.37	9.01	5.46	1.44	1.42
7	Negative Lens	FastON	4	-5	0	8.58	5.55	8.52	5.3	0.94	1.14
8	Negative Lens	FastON	4	-9	0.5	9.05	5.69	8.54	5.33	1.23	1.05
10	Negative Lens	FastON	4	-0.75	1	8.92	5.67	8.82	5.56	1.22	1.2
11	Negative Lens	FastON	4	-4	0	8.82	5.57	8.54	5.31	1.11	1.15
12	Negative Lens	FastON	4	-2.5	-0.25	8.93	5.52	8.7	5.4	1.29	1.21
234	Negative Lens	FastON	4	-12.5	1	9.36	5.64	8.86	5.26	1.56	1.37
235	Negative Lens	FastON	4	-12.5	-0.5	9.57	5.75	8.97	5.54	1.6	1.24
236	Negative Lens	FastON	4	-11.5	-0.5	9.25	5.65	8.88	5.33	1.43	1.35
237	Negative Lens	FastON	4	-11	1	9.46	5.74	8.84	5.25	1.56	1.44
238	Negative Lens	FastON	4	-13	-2	9.14	5.52	8.4	5.11	1.51	1.15
239	Negative Lens	FastON	4	-14	0.75	9.4	5.68	8.98	5.47	1.47	1.34
1	Positive Lens	FastON	4	9	2.5	8.54	5.36	8.62	5.44	1.13	1.19
2	Positive Lens	FastON	4	7	0.5	8.69	5.57	8.93	5.76	1.07	1.12
3	Positive Lens	FastON	4	10	1	8.33	5.18	8.62	5.4	1.09	1.12
4	Positive Lens	FastON	4	7	0.5	8.48	5.4	8.44	5.34	0.9	1.02
5	Positive Lens	FastON	4	10	2	8.35	5.2	8.59	5.4	1.11	1.12
6	Positive Lens	FastON	4	7	0.5	8.58	5.19	8.76	5.41	1.35	1.29
228	Positive Lens	FastON	4	6.5	0.25	8.64	5.02	8.9	5.29	1.42	1.37
229	Positive Lens	FastON	4	6.5	1	8.51	4.98	8.74	5.2	1.42	1.39
230	Positive Lens	FastON	4	5.5	0	8.31	4.68	8.46	4.96	1.41	1.29
231	Positive Lens	FastON	4	7.5	0.25	8.48	4.96	8.97	5.4	1.39	1.41
232	Positive Lens	FastON	4	-6	0	#NULL!	#NULL!	#NULL!	#NULL!	#NULL!	#NULL!
233	Positive Lens	FastON	4	6.5	0.5	8.5	4.8	8.59	5.33	0.62	1.14
